# Supplementary material
Source: publisher figshare collection journal article supplement (https://acs.figshare.com/ndownloader/files/4712311)
Supplement: Supplementary file 1 [file 4712311]

**An Effective Strategy to Tune Supramolecular Interaction  
via Spiro-bridged Spacer in Oligothiophene-S,S-dioxides  
and Their Anomalous Photoluminescent (PL) Behavior**

Ling-Hai Xie,<sup>†</sup> Xiao-Ya Hou,<sup>‡</sup> Yu-Ran Hua,<sup>‡</sup> Yan-Qin Huang,<sup>†</sup> Bao-Min Zhao,<sup>‡</sup> Feng

Liu,<sup>‡</sup> Bo Peng,<sup>‡</sup> Wei Wei,<sup>‡</sup> and Wei Huang<sup>\*,†</sup>

<sup>†</sup> Institute of Advanced Materials (IAM), Nanjing University of Posts and Telecommunications (NUPT),

66 XinMoFan Road, Nanjing 210003, China

<sup>‡</sup> Institute of Advanced Materials, Fudan University, 220 Handan Road, Shanghai 200433, China

**Chemicals.** Magnesium turnings, *N*-bromosuccinimide (NBS), 3-bromothiophene, fluorenone, Me<sub>2</sub><sup>t</sup>BuSiCl, and *m*-chloroperbenzoic acid (*m*-CPBA) were obtained from Aldrich Chemical Co. and were used without further purification. Spiro[cyclopenta[1,2-*b*:4,3-*b'*]dithiophene-7,9'-fluorene] (SDTF) was prepared as previously reported. THF and diethyl ether were dried over sodium benzophenone ketyl anion radical and distilled under a dry nitrogen atmosphere immediately prior to use.

**Procedures.** <sup>1</sup>H- and <sup>13</sup>C-NMR in CDCl<sub>3</sub> were recorded at 400 MHz using a Varian Mercury 400 plus spectrometer. Mass spectra were recorded on a Shimadzu GCMS-QP2010 plus equipped with DB-5 ms column or a Shimadzu AXIMA-CFR plus spectrometer. The MALDI-TOF MS spectra were recorded in reflective mode, no substrates were used. Elemental analyses were carried out on an Elementar Analysensysteme GmbH Vario EL III Instrument. Absorption spectra (1 μM in CH<sub>2</sub>Cl<sub>2</sub>) were measured with a Shimadzu UV-3150 spectrometer at 25 °C, and emission spectra (1 μM in CH<sub>2</sub>Cl<sub>2</sub>) were recorded on a Shimadzu RF-530XPC luminescence spectrometer. Photoluminescence quantum yields (PLQY) were

---

\* To whom correspondence should be addressed. Tel: +86 25 8349 2333 / 8588 2333; Fax: +86 25 8349 2333 / 2349; E-mail: wei-huang@njupt.edu.cn / iamdirector@njupt.edu.cn.

determined in dilute solutions ( $10^{-5}$  M) of  $\text{CHCl}_3$  and cyclohexane, using quinine sulfate as reference, while for measurements on the solid state, samples were spin cast on a quartz substrate from  $\text{CHCl}_3$  solution ( $5 \text{ mg mL}^{-1}$ ). The solid samples were placed into a 8 inch diameter integrating sphere and excited with a He–Cd CW laser ( $\lambda = 325 \text{ nm}$ ). Differential scanning calorimetry (DSC) analyses were performed on a Shimadzu DSC-60A Instrument. Thermogravimetric analyses (TGA) were conducted on a Shimadzu DTG-60H thermogravimetric Analyzer under a heating rate of  $10^\circ\text{C/min}$  and a nitrogen flow rate of  $20 \text{ cm}^3/\text{min}$ . Cyclic voltammetric (CV) studies were conducted using an Eco Chemie B. V. AUTOLAB potentiostat in a typical three-electrode cell with a platinum sheet working electrode, a platinum wire counter electrode, and a silver/silver nitrate ( $\text{Ag}/\text{Ag}^+$ ) reference electrode. All electrochemical experiments were carried out under a nitrogen atmosphere at room temperature in an electrolyte solution of  $0.1 \text{ M}$  tetrabutylammonium hexafluorophosphate ( $\text{Bu}_4\text{N}^+\text{PF}_6^-$ ) in  $\text{CH}_2\text{Cl}_2$  at a sweeping rate of  $0.1 \text{ V/s}$ . According to the redox onset potentials of the CV measurements, the HOMO/LUMO energy levels of the materials are estimated based on the reference energy level of ferrocene ( $4.8 \text{ eV}$  below the vacuum):  $\text{HOMO/LUMO} = -(E_{\text{onset}} - 0.0468 \text{ V}) - 4.8 \text{ eV}$ , where the value  $0.0468 \text{ V}$  is for FOC vs  $\text{Ag}/\text{Ag}^+$ .

Data for X-ray structure analysis were collected at room temperature on a Bruker SMART 1K CCD area detector with Mo  $\text{K}\alpha$  radiation ( $\lambda = 0.71073 \text{ \AA}$ ) and graphite monochromator. Structures were solved by direct methods and refined against  $F^2$  with the full-matrix, least-squares methods using SHELXS-97 and SHELXL-97, respectively. Crystal data for BSiSDTF:  $\text{C}_{33}\text{H}_{40}\text{S}_2\text{Si}_2$ ,  $M = 556.95$ , colorless cuboid  $0.35 \times 0.20 \times 0.20 \text{ mm}$ , monoclinic,  $\text{P}2_1/\text{c}$ ,  $Z = 8$ ,  $a = 25.681(11) \text{ \AA}$ ,  $b = 12.073(5) \text{ \AA}$ ,  $c = 23.725(10) \text{ \AA}$ ,  $\alpha = 90^\circ$ ,  $\beta = 117.111^\circ(5)$ ,  $\gamma = 90^\circ$ ,  $V = 6547(5) \text{ \AA}^3$ ,  $F(000) = 2384$ ,  $D_c = 1.130 \text{ Mg m}^{-3}$ ,  $\mu(\text{Mo K}\alpha) = 0.255 \text{ mm}^{-1}$ . Crystal data for BSiSDTFO:  $\text{C}_{33}\text{H}_{40}\text{O}_2\text{S}_2\text{Si}_2$ ,  $M = 588.95$ , green needle  $0.15 \times 0.10 \times 0.02 \text{ mm}$ , triclinic,  $\text{P}\bar{1}$ ,  $Z = 4$ ,  $a = 12.45(4)$ ,  $b = 12.94(4)$ ,  $c = 22.63(7) \text{ \AA}$ ,  $\alpha = 80.74^\circ(5)$ ,  $\beta = 86.74^\circ(5)$ ,  $\gamma = 79.99^\circ(6)$ ,  $V = 3543(18) \text{ \AA}^3$ ,  $F(000) = 1256$ ,  $D_c = 1.104 \text{ Mg m}^{-3}$ ,  $\mu(\text{Mo K}\alpha) = 0.243 \text{ mm}^{-1}$ .

**Synthesis of 2,5-bis(dimethyl-*t*-butylsilyl)-spiro[cyclopenta[1,2-b:4,3-b']dithiophene-7,9'-fluorene] (BSiSDTF)**

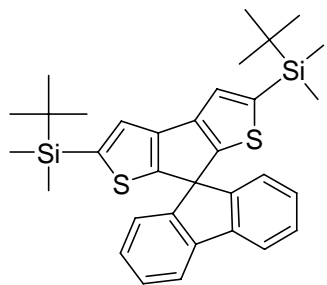

To a solution of SDTF (1.0 g, 3.05 mmol, 1 equiv) in dry THF (10 mL) was added dropwise *n*-butyllithium (1.6 M in hexane, 3.8 mL, 6.1 mmol, 2 equiv) at room temperature. After 1 h, a solution of dimethyl-*tert*-butylsilyl chloride (0.921 g, 6.1 mmol, 2 equiv.) in THF (20 mL) was added dropwise. The reaction mixture was allowed to stir at room temperature overnight. Then water was added, the aqueous layer was extracted twice with ether, and the combined organic phases were dried over MgSO<sub>4</sub> and evaporated. After vacuum distillation, the solid residues were purified by column chromatography on silica gel with CH<sub>2</sub>Cl<sub>2</sub>/hexane to afford BSiSDTF as colorless solids (0.848 g, 50%). MALDI-TOF-MS (*m/z*): [M<sup>+</sup>] calcd. For C<sub>33</sub>H<sub>40</sub>S<sub>2</sub>Si<sub>2</sub>, 556.2; Found: 556.1. <sup>1</sup>H NMR (400 MHz, CDCl<sub>3</sub>, ppm): δ 7.796-7.777 (d, *J* = 8.0 Hz, 2 H), 7.397-7.359 (d, *J* = 7.6 Hz, 2 H), 7.306 (s, 2 H), 7.196-7.158 (t, *J* = 7.6 Hz, 2 H), 6.935-6.916 (d, *J* = 7.6 Hz, 2 H), 0.906 (s, 18 H), 0.256 (s, 12 H). <sup>13</sup>C NMR (100 MHz, CDCl<sub>3</sub>, ppm): δ 156.818, 147.633, 145.403, 142.081, 141.209, 128.398, 128.214, 125.597, 124.148, 120.347, 62.785, 26.61, 17.193, -4.715. Anal. Calcd for C<sub>33</sub>H<sub>40</sub>S<sub>2</sub>Si<sub>2</sub>: C, 71.16; H, 7.24; S, 11.51; Si, 10.09. Found: C, 71.13; H, 7.23.

**2-(Dimethyl-*t*-butylsilyl)-spiro[cyclopenta[1,2-b:4,3-b']dithiophene-7,9'-fluorene]**

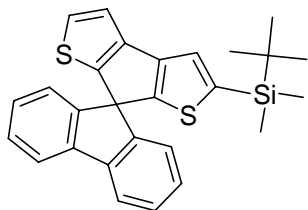

To afford byproduct 2-(dimethyl-*t*-butylsilyl)-spiro[cyclopenta[1,2-b:4,3-b']dithiophene-7,9'-fluorene] as colorless solids (0.405 g, 30%). GCMS

( $m/e$ ): 442. ( $M^+$ ).  $^1\text{H}$  NMR (400 MHz,  $\text{CDCl}_3$ , ppm):  $\delta$  7.809-7.79 (d,  $J = 7.6$  Hz, 2 H), 7.408-7.368 (td,  $J = 7.6$  Hz,  $J = 1.2$  Hz, 2 H), 7.316-7.304 (d, s,  $J = 4.8$  Hz, 2 H), 7.206-7.163 (t, d,  $J = 7.6$  Hz,  $J = 4.8$  Hz, 3 H), 6.938-6.919 (d,  $J = 7.6$  Hz, 2 H), 0.922 (s, 9 H), 0.274 (s, 6 H).  $^{13}\text{C}$  NMR (100 MHz,  $\text{CDCl}_3$ , ppm): 156.628, 150.74, 147.457, 145.572, 143.722, 142.22, 141.217, 128.959, 128.491, 128.258, 125.535, 124.088, 120.42, 118.384, 62.813, 26.63, 17.2, -4.684. Anal. Calcd for  $\text{C}_{27}\text{H}_{26}\text{S}_2\text{Si}$ : C, 73.25; H, 5.92; S, 14.49; Si, 6.34. Found: C, 73.21; H, 5.90.

**2,5-Bis(dimethyl-*t*-butylsilyl)-spiro[cyclopenta[1,2-*b*:4,3-*b'*]dithiophene-mono-S, S-dioxides -7,9'-fluorene] (BSiSDTFO)**

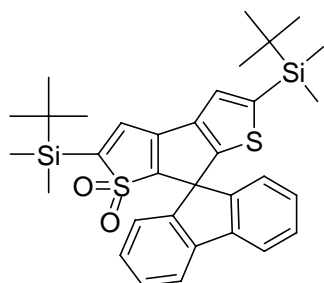

To a solution of BSiSDTF (1.0 g, 1.8 mmol) in 30 mL of methylene chloride was added stepwise *m*-CPBA (70%) (1.864 g, 7.54 mmol, 4.2 equiv) at room temperature. The solution was stirred for about 48 h at room temperature. Then the mixture was quenched with a saturated solution of  $\text{NaHCO}_3$  and extracted with  $\text{CH}_2\text{Cl}_2$ , and the organic phase was separated, dried over  $\text{MgSO}_2$ , and evaporated. The crude product was chromatographed on silica gel using cyclohexane:ethyl acetate (6:1) as the eluent to provide green monosulfone BSiSDTFO (0.424 g, 40% yield). MALDI-TOF-MS ( $m/z$ ): [ $M^+$ ] calcd. For  $\text{C}_{33}\text{H}_{40}\text{O}_2\text{S}_2\text{Si}_2$ , 588.2; Found: 588.3.  $^1\text{H}$  NMR (400 MHz,  $\text{CDCl}_3$ , ppm):  $\delta$  7.79-7.772 (d,  $J = 7.6$  Hz, 2 H), 7.42-7.38 (td,  $J = 7.6$  Hz,  $J = 1.2$  Hz, 2 H), 7.286 (s, 1 H), 7.26 (s, 1 H), 7.247-7.206 (td,  $J = 7.6$  Hz,  $J = 1.2$  Hz, 2 H), 7.048-7.029 (d,  $J = 7.6$  Hz, 2 H), 1.002 (s, 9 H), 0.897 (s, 9 H), 0.297 (s, 6 H), 0.256 (s, 6 H).  $^{13}\text{C}$  NMR (100 MHz,  $\text{CDCl}_3$ , ppm):  $\delta$  162.181, 155.217, 147.705, 144.887, 144.754, 141.896, 141.524, 141.446, 132.388, 129.15, 128.323, 125.675, 124.049, 120.809, 63.375, 26.6, 26.514, 17.474, 17.11, -4.783, -5.716. Anal. Calcd for  $\text{C}_{33}\text{H}_{40}\text{O}_2\text{S}_2\text{Si}_2$ : C, 67.30; H, 6.85; O, 5.43; S, 10.89; Si, 9.54. Found: C, 67.28; H, 6.88.

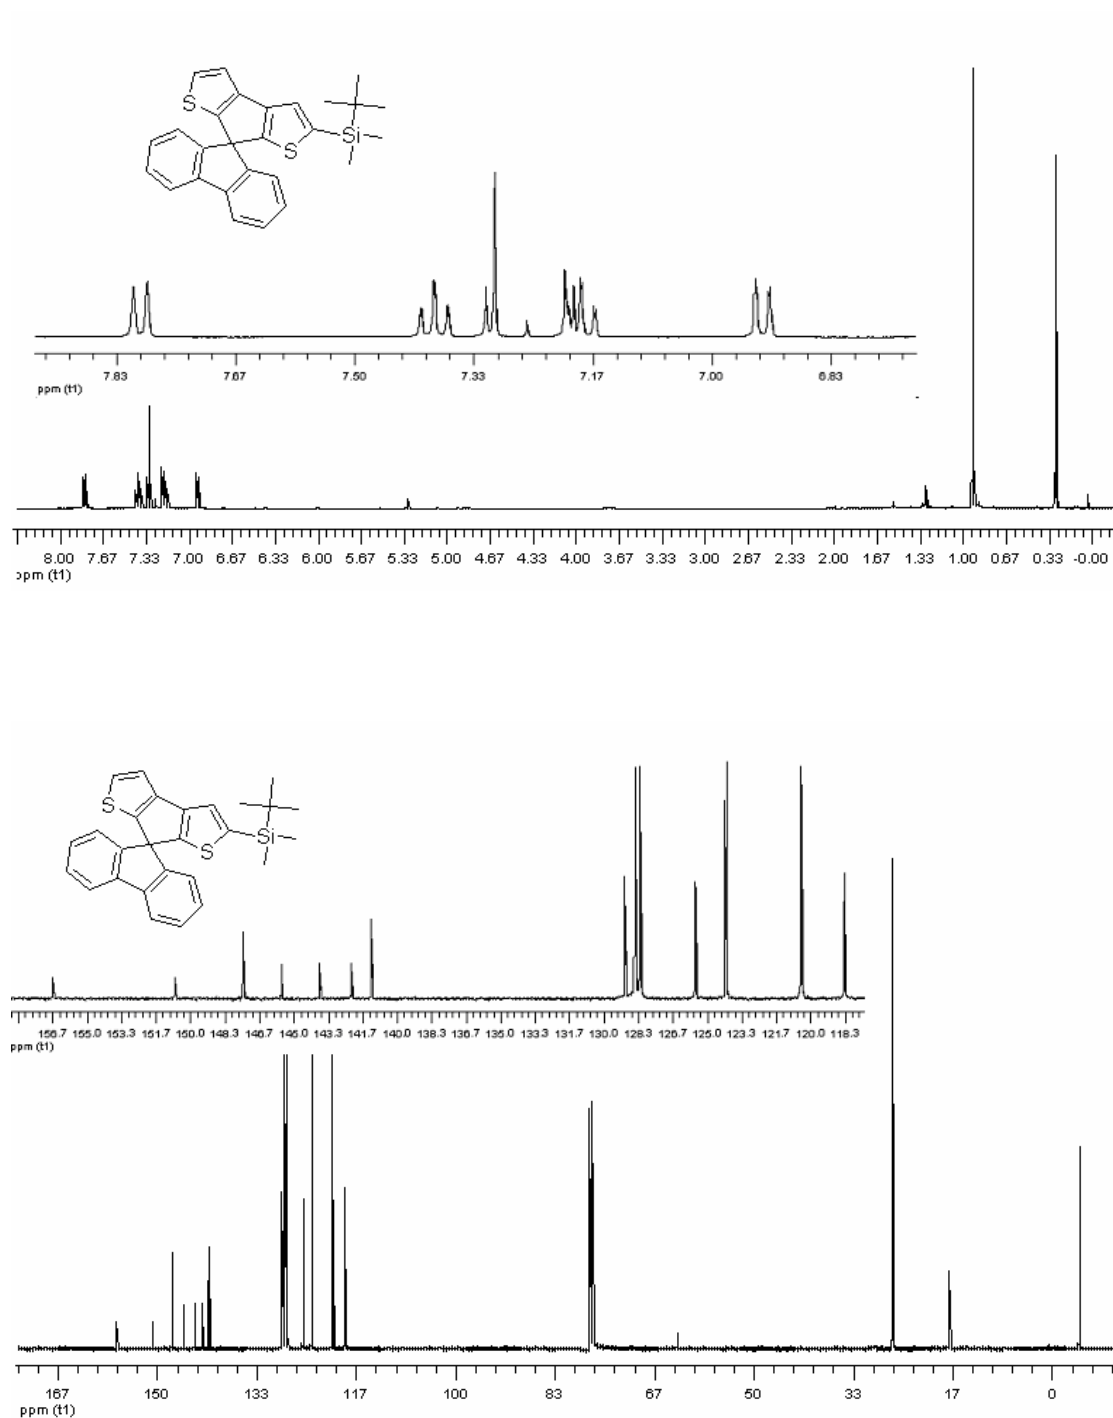

**Figure SI-1.** The  $^1\text{H}$ -NMR and  $^{13}\text{C}$ -NMR spectra of 2-(dimethyl-*t*-butylsilyl)-spiro[cyclopenta[1,2-b:4,3-b']dithiophene-7,9'-fluorene].

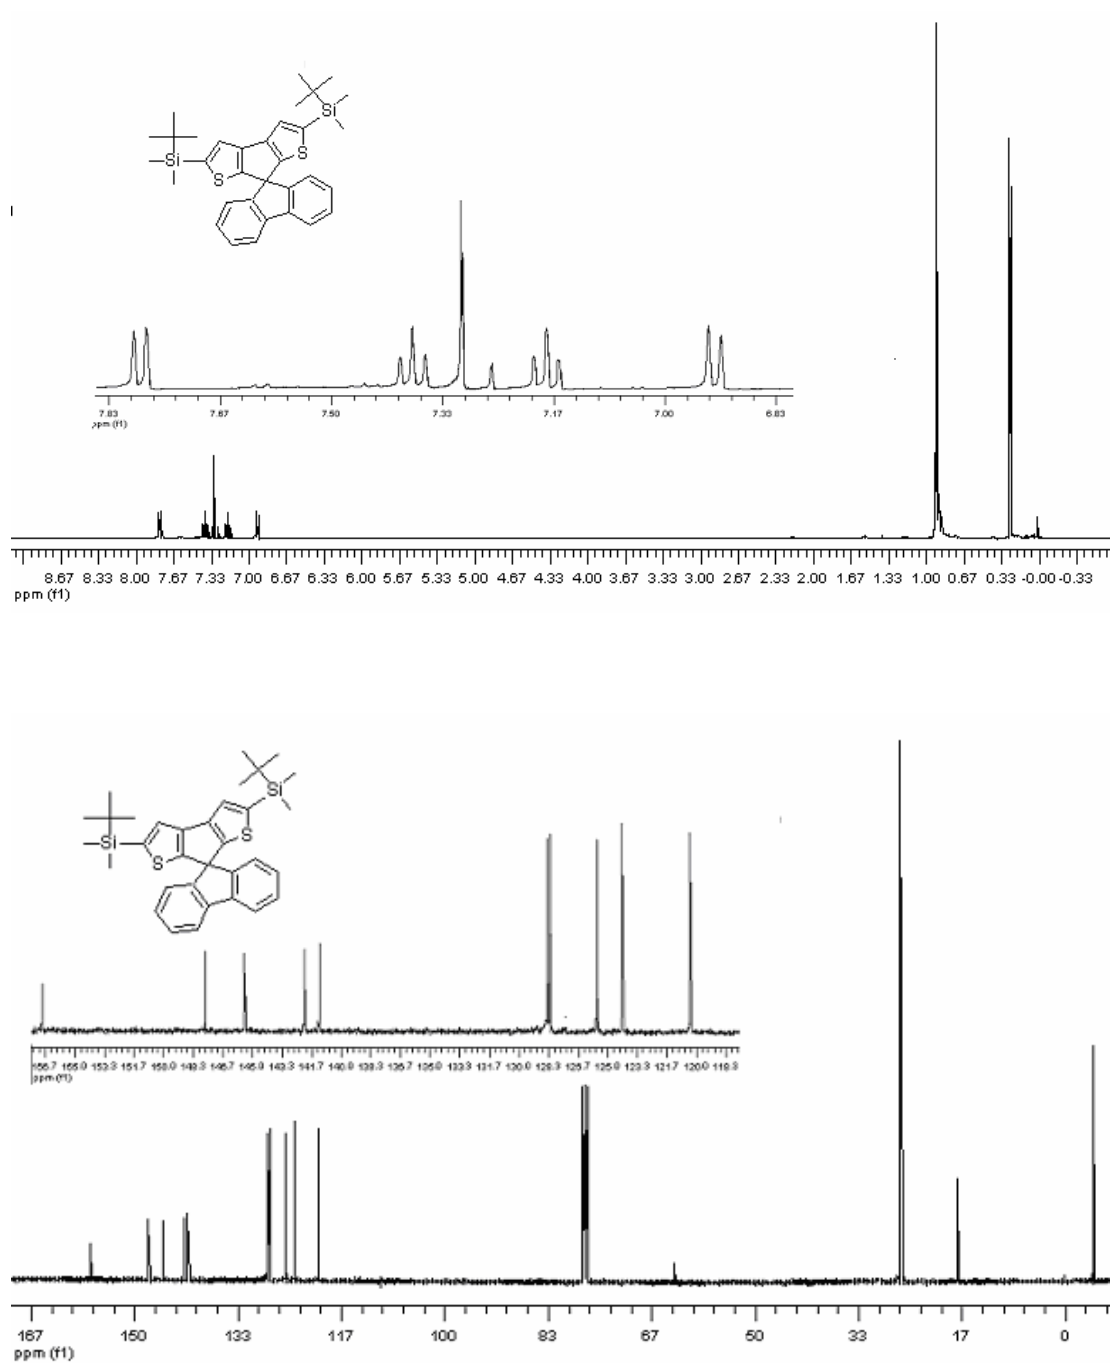

**Figure SI-2.** The  $^1\text{H}$ -NMR and  $^{13}\text{C}$ -NMR spectra of 2,5-bis(dimethyl-*t*-butylsilyl)-spiro[cyclopenta[1,2-b:4,3-b']dithiophene-7,9'-fluorene]

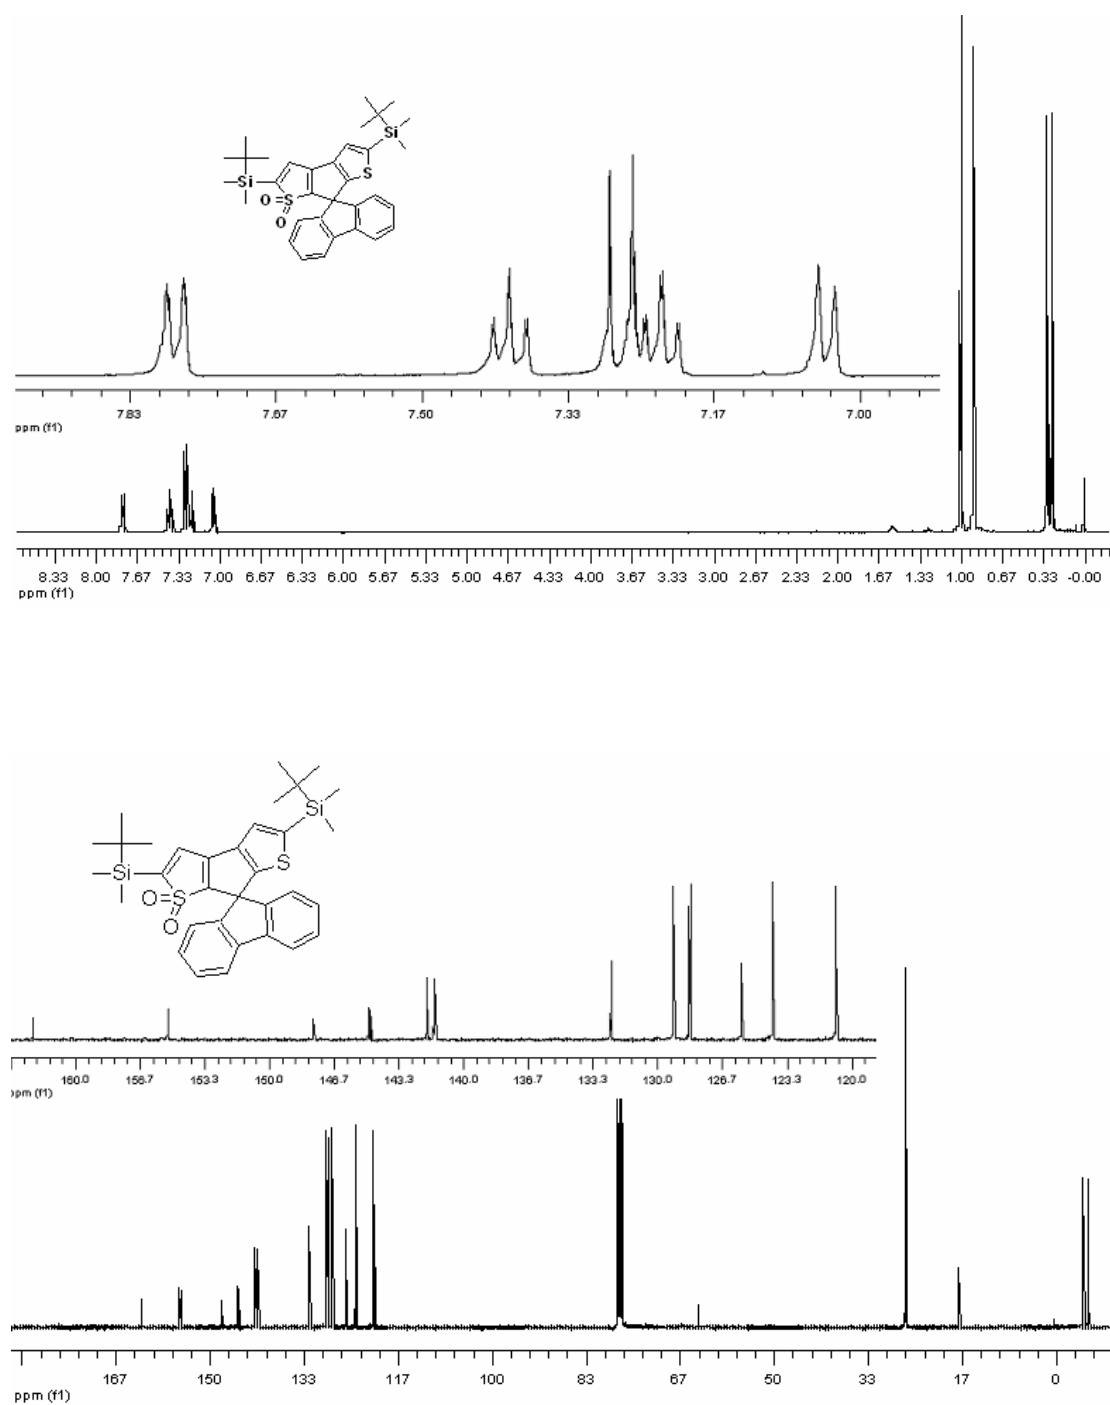

**Figure SI-3.** The  $^1\text{H}$ -NMR and  $^{13}\text{C}$ -NMR spectra of 2,5-bis(dimethyl-*t*-butylsilyl)-spiro[cyclopenta[1,2-*b*:4,3-*b'*]dithiophene-*S,S*-dioxides-7,9'-fluorene].

Data: DiSIFTT-01-0001.D18 15 Jul 2005 15:53 Cal: lhxie-050715 15 Jul 2005 15:37  
 Kratos PC Axima CFRplus V2.4.0: Mode reflectron, Power: 93, Blanked, P.Ext. @ 600 (bin 56)  
 %Int. 65 mV[sum= 4172 mV] Profiles 70-133 Unsmoothed -Baseline 80

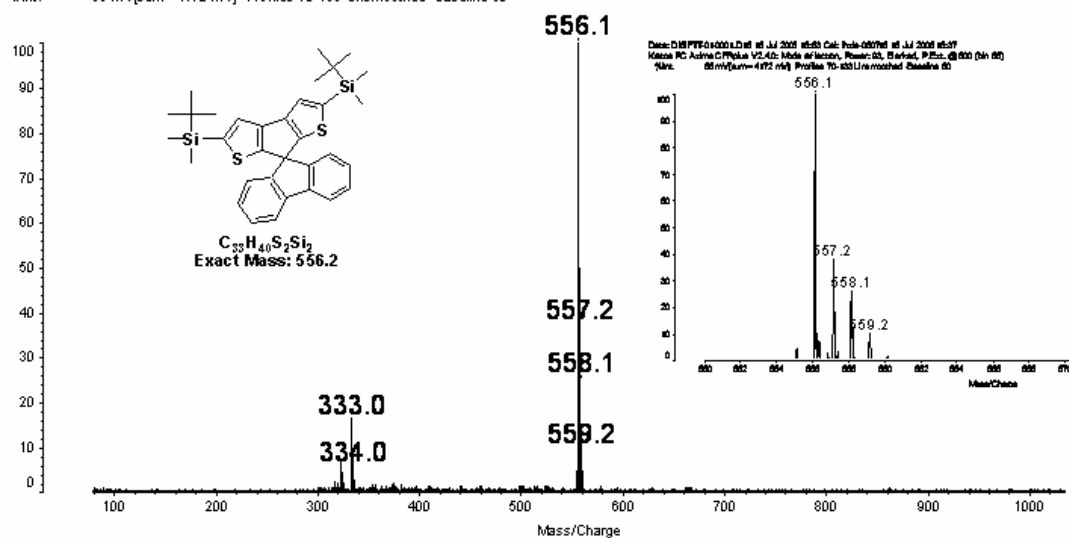

Data: DiSIFTT-Oxo-02-0001.L1 19 Aug 2005 10:41 Cal: xli-050819 19 Aug 2005 9:35  
 Kratos PC Axima CFRplus V2.4.0: Mode reflectron, Power: 100, Blanked, P.Ext. @ 1000 (bin 77)  
 %Int. 26 mV[sum= 1746 mV] Profiles 1-67 Unsmoothed -Baseline 80

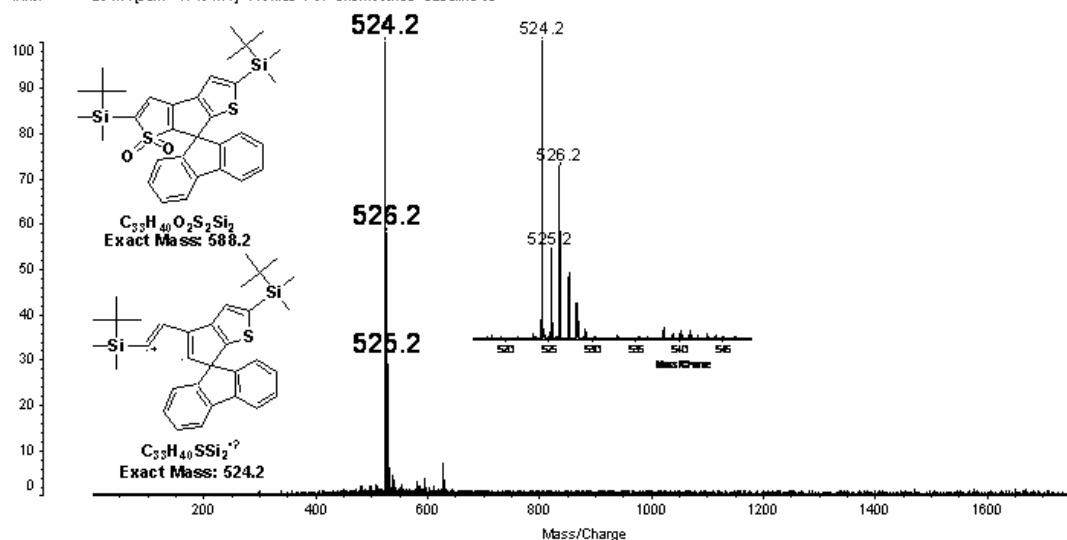

Figure SI-4. The MALDI-TOF-MS spectra of BSisDTF and BSisDTFO.



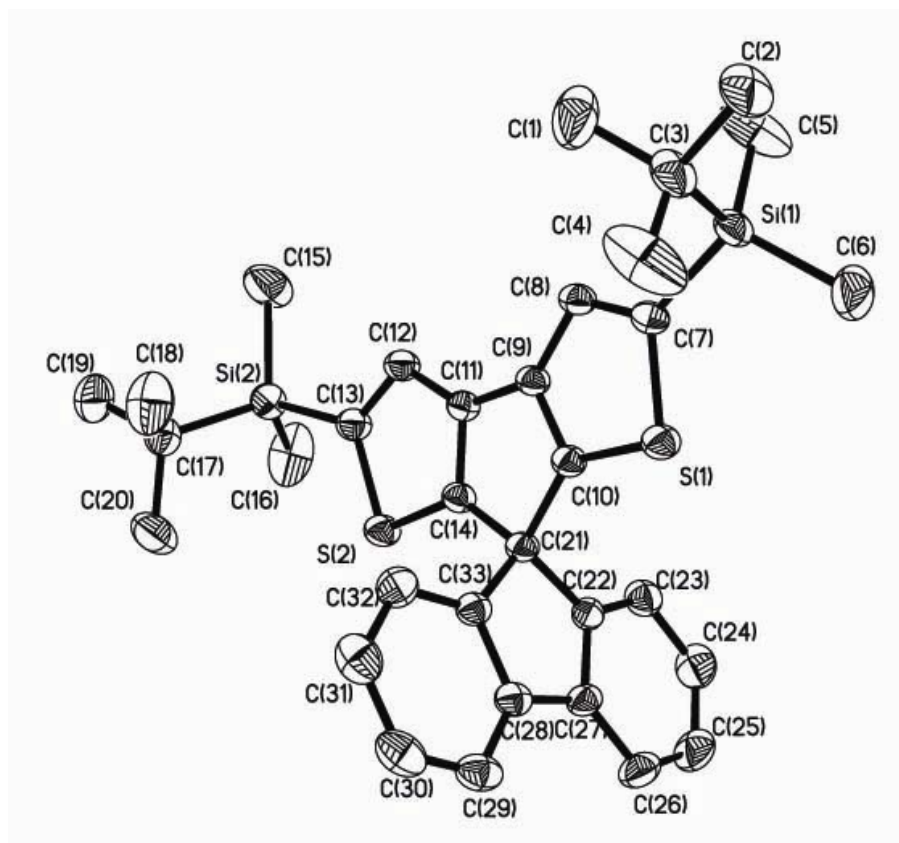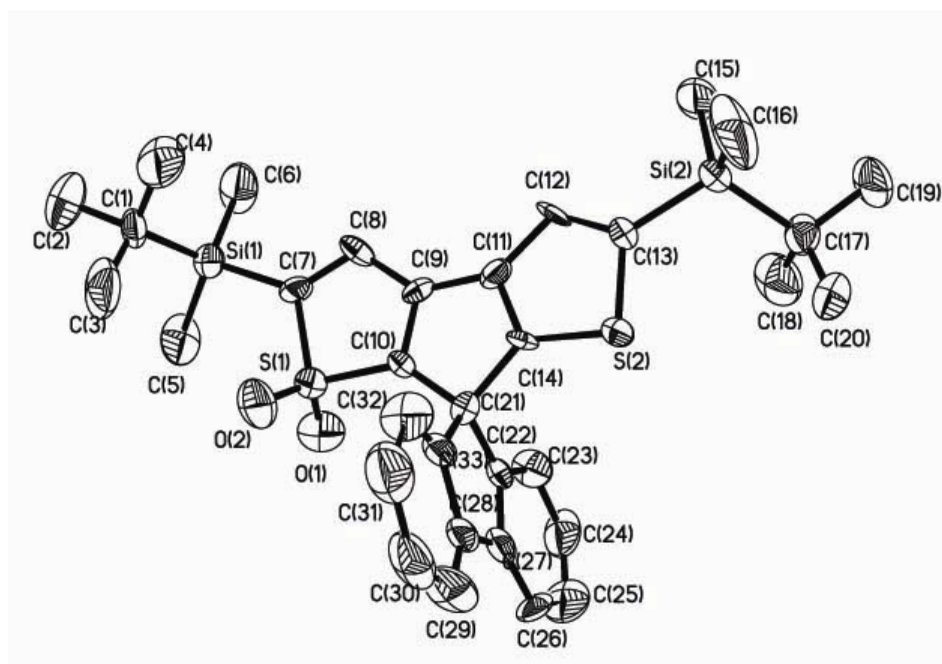

**Figure SI-5.** ORTEP drawing of BSiSDTF and BSiSDTFO. The ellipsoid probability is 30%.

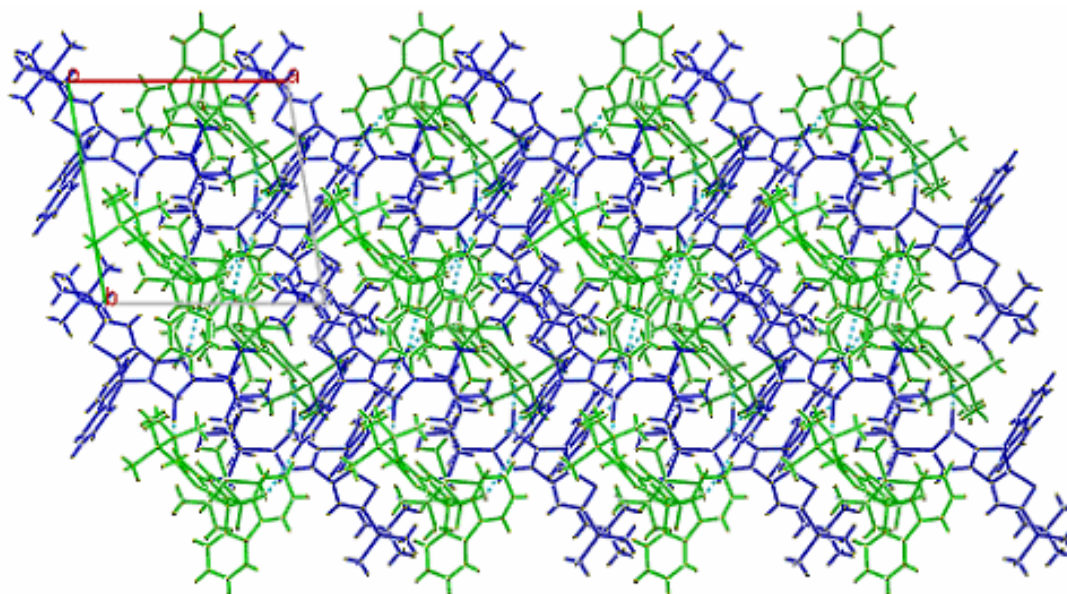

**Figure SI-6.** View along the  $c$  axis of the crystal structure of BSiSDTFO.

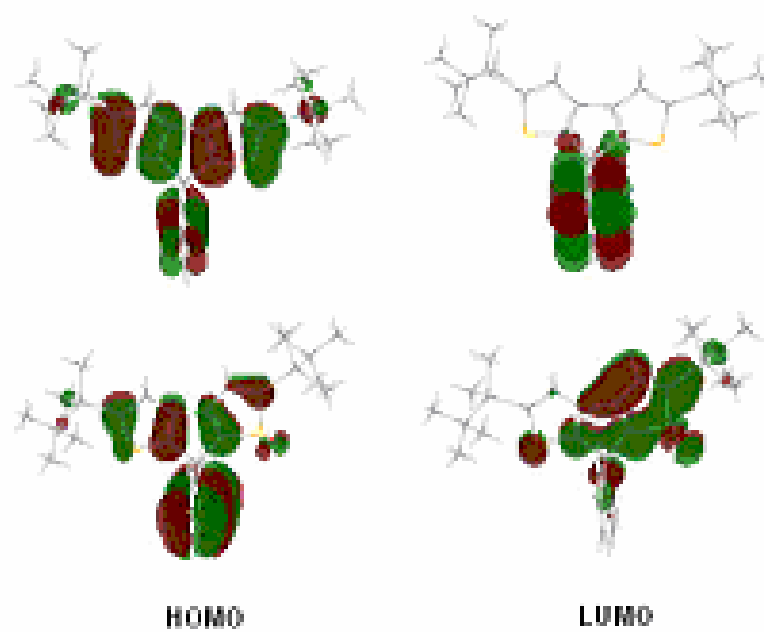

**Figure SI-7.** B3LYP/6-31G\* electronic densities and energies of the frontier orbitals of BSiSDTF and BSiSDTFO.

**Table SI-1.** Hydrogen bonds for BSiSDTFO [ $\text{\AA}$  and deg.].

| D-H...A               | d (D-H) | d (H...A) | d (D...A) | <(DHA) |
|-----------------------|---------|-----------|-----------|--------|
| C(3)-H(3B)...O(2)     | 0.96    | 2.55      | 3.376(17) | 143.8  |
| C(8)-H(8A)...O(4)     | 0.93    | 2.87      | 3.643(14) | 141.7  |
| C(12)-H(12A)...O(4)   | 0.93    | 2.69      | 3.500(15) | 146    |
| C(20)-H(20B)...S(2)   | 0.96    | 2.82      | 3.607(12) | 139.8  |
| C(35)-H(35C)...O(4)   | 0.96    | 2.88      | 3.623(17) | 134.7  |
| C(26)-H(26A)...S(2)#1 | 0.93    | 2.94      | 3.835(15) | 161.7  |
| C(38)-H(38C)...O(2)#2 | 0.96    | 2.8       | 3.562(13) | 137.3  |
| C(41)-H(41A)...O(2)#2 | 0.93    | 2.41      | 3.234(15) | 147.1  |
| C(48)-H(48B)...O(1)#3 | 0.96    | 2.84      | 3.569(13) | 133.1  |
| C(53)-H(53B)...O(1)#3 | 0.96    | 2.91      | 3.850(15) | 167.9  |
| C(58)-H(58A)...O(1)#4 | 0.93    | 2.61      | 3.520(19) | 167.2  |
| C(62)-H(62A)...O(3)#5 | 0.93    | 2.59      | 3.383(14) | 143.4  |
